# Supplementary material for: Ligand design of zero-field splitting in trigonal prismatic Ni(ii) cage complexes
Source: Royal Society of Chemistry journal article supplement (doi:10.1039/d1dt02156g), 2022-01-01
Supplement: d1dt02156g1.pdf [file d1dt02156g1.pdf]

Electronic Supplementary Information for:

# Ligand Design of Zero-Field Splitting in Trigonal Prismatic Ni(II) Cage Complexes

Anthony J. Campanella,<sup>a</sup> Tyler M. Ozvat,<sup>a</sup> and Joseph M. Zadrozny\*<sup>a</sup>

<sup>a</sup>*Department of Chemistry, Colorado State University, Fort Collins, Colorado 80523, USA.*

## Table of Contents

| Description                                                                               | Page       |
|-------------------------------------------------------------------------------------------|------------|
| <b>Full Experimental Details.</b>                                                         | <b>S3</b>  |
| <b>Table S1.</b> Crystallographic information for the structural refinement of <b>1</b> . | <b>S8</b>  |
| <b>Table S2.</b> Crystallographic information for the structural refinement of <b>2</b> . | <b>S9</b>  |
| <b>Table S3.</b> Crystallographic information for the structural refinement of <b>3</b> . | <b>S10</b> |
| <b>Table S4.</b> Crystallographic information for the structural refinement of <b>4</b> . | <b>S11</b> |
| <b>Table S5.</b> Crystallographic information for the structural refinement of <b>5</b> . | <b>S12</b> |
| <b>Table S6.</b> Triplet and Singlet Contributions to <i>D</i> .                          | <b>S13</b> |
| <b>Table S7.</b> Multiconfiguration coefficients for <b>1</b> .                           | <b>S13</b> |
| <b>Table S8.</b> Multiconfiguration coefficients for <b>2</b> .                           | <b>S14</b> |
| <b>Table S9.</b> Multiconfiguration coefficients for <b>3</b> .                           | <b>S14</b> |
| <b>Table S10.</b> Multiconfiguration coefficients for <b>4</b> .                          | <b>S15</b> |
| <b>Table S11.</b> Multiconfiguration coefficients for <b>5</b> .                          | <b>S15</b> |
| <b>Fig. S1.</b> Deconvoluted electron absorption spectra of <b>1</b> .                    | <b>S16</b> |
| <b>Fig. S2.</b> Deconvoluted electron absorption spectra of <b>2</b> .                    | <b>S17</b> |
| <b>Fig. S3.</b> Deconvoluted electron absorption spectra of <b>3</b> .                    | <b>S18</b> |
| <b>Fig. S4.</b> Deconvoluted electron absorption spectra of <b>4</b> .                    | <b>S19</b> |
| <b>Fig. S5.</b> Deconvoluted electron absorption spectra of <b>5</b> .                    | <b>S20</b> |
| <b>Fig. S6.</b> <sup>11</sup> B-NMR spectra of phenylboronic acid.                        | <b>S21</b> |
| <b>Fig. S7.</b> <sup>11</sup> B-NMR spectra of 3,5-dimethoxyphenylboronic acid.           | <b>S22</b> |
| <b>Fig. S8.</b> <sup>11</sup> B-NMR spectra of pentafluorophenylboronic acid.             | <b>S23</b> |
| <b>Fig. S9.</b> Reduced magnetization data of <b>1</b> .                                  | <b>S24</b> |
| <b>Fig. S10.</b> Reduced magnetization data of <b>2</b> .                                 | <b>S25</b> |
| <b>Fig. S11.</b> Reduced magnetization data of <b>4</b> .                                 | <b>S26</b> |
| <b>Fig. S12.</b> Reduced magnetization data of <b>5</b> .                                 | <b>S27</b> |
| <b>Fig. S13.</b> Triplet Contributions to <i>D</i> .                                      | <b>S28</b> |
| <b>Fig. S14.</b> Singlet Contributions to <i>D</i> .                                      | <b>S29</b> |
| <b>Fig. S15.</b> Depictions of some example excitations.                                  | <b>S30</b> |
| <b>References</b>                                                                         | <b>S31</b> |

## Full Experimental Details

**General Considerations.** Compounds **1-3** were synthesized using acetonitrile (MeCN) purified through a commercial solvent purification system from LC Technologies. Non-purified MeCN in atmospheric conditions was found to work as well for the syntheses of **1-3**, however, higher yields were obtained using MeCN from a solvent purification system under N<sub>2</sub>. Nitromethane (MeNO<sub>2</sub>) used in the synthesis of **4-5** was degassed via the freeze-pump-thaw method and stored over 3 Å molecular sieves for 3 days prior to use. Anhydrous nickelous chloride dimethoxyethane adduct (NiCl<sub>2</sub>•DME) was synthesized following a literature procedure.<sup>1</sup> 3,4-hexanedione-dioxime,<sup>2</sup> glyoxime,<sup>3</sup> and dichloroglyoxime<sup>3</sup> were synthesized following their respective literature procedures. The aryl boronic acids used throughout were purchased from commercial sources and used as received. Prior to the synthesis of **4** and **5**, excess moisture was removed from phenylboronic acid by heating the powder at 80°C under high vacuum for 12 hours.

**Ni(L1)•0.5H<sub>2</sub>O (1)** In a 25 mL round-bottom flask, 202 mg (0.85 mmol, 1 eq.) of NiCl<sub>2</sub>•6H<sub>2</sub>O was dissolved in 10 mL of MeCN, followed by 367 mg (2.55 mmol, 3 eq.) of 3,4-hexanedione-dioxime, producing a maroon solution. This solution was heated at reflux for one hour under N<sub>2</sub>, followed by the addition of 360 mg (1.70 mmol, 2 eq.) of pentafluorophenylboronic acid. The subsequent solution was then refluxed for four days, while remaining under N<sub>2</sub>. After this time, a light green precipitant was observable in the reaction flask. The solution was cooled to room temperature and filtered open to air. The resulting light green powder was washed with MeCN (3 × 5 mL) followed by ethyl ether (3 × 10 mL) and dried overnight in a vacuum oven at 70°C. The final yield was 310 mg (43%) of **1**. Crystals suitable for single crystal x-ray diffraction were grown by layering a saturated chloroform solution of **1** with MeCN. IR (cm<sup>-1</sup>, diamond ATR): 2984, 2944, 2880, 1645, 1609, 1467, 1293, 1129, 1106, 1058, 1032, 978, 919, 821, 752, 587. UV-vis (Methylene chloride); λ<sub>max</sub> (ε<sub>M</sub>, M<sup>-1</sup>cm<sup>-1</sup>): 770 nm (41.8). LC-MS (m/z): positive ion mode: {H[Ni(L1)]}<sup>+</sup>, 841.17. Elemental analysis for C<sub>30</sub>H<sub>40</sub>B<sub>2</sub>F<sub>10</sub>N<sub>6</sub>NiO<sub>6</sub>•0.5H<sub>2</sub>O calculated (found): %C: 42.40 (42.35), %H: 3.68 (3.97), %N: 9.89 (9.68).

**Ni(L2)•1H<sub>2</sub>O (2)** In a 25 mL round-bottom flask, 178 mg (0.75 mmol, 1 eq.) of NiCl<sub>2</sub>•6H<sub>2</sub>O was dissolved in 10 mL of MeCN, followed by 324 mg (2.25 mmol, 3 eq.) of 3,4-hexanedione-dioxime, producing a maroon solution. This solution was heated at reflux for one hour under N<sub>2</sub>, followed

by the addition of 273 mg (1.50 mmol, 2 eq.) of 3,5-dimethoxyphenylboronic acid. The subsequent solution was then refluxed for two days, while remaining under N<sub>2</sub>. After this time, a light green precipitant was observable in the reaction flask. The solution was cooled to room temperature and filtered open to air. The resulting light green powder was washed with MeCN (3 × 5 mL) followed by ethyl ether (3 × 10 mL) and dried overnight in a vacuum oven at 70°C. The final yield was 415 mg (69%) of **2**. Crystals suitable for single crystal x-ray diffraction were grown by layering a saturated methylene chloride solution of **2** with MeCN IR (cm<sup>-1</sup>, diamond ATR): 2978, 2946, 2932, 2832, 1583, 1456, 1410, 1331, 1284, 1245, 1198, 1171, 1148, 1106, 1062, 1025, 989, 900, 846, 816, 756, 710, 585. UV-vis (H<sub>2</sub>O); λ<sub>max</sub> (ε<sub>M</sub>, M<sup>-1</sup>cm<sup>-1</sup>): 772 nm (62.3); 464 nm (94.5). LC-MS (m/z): positive ion mode: {H[Ni(L2)]}<sup>+</sup>, 781.29. Elemental analysis for C<sub>34</sub>H<sub>48</sub>B<sub>2</sub>N<sub>6</sub>NiO<sub>10</sub>•H<sub>2</sub>O calculated (found): %C: 51.10 (50.87), %H: 6.31 (6.05), %N: 10.52 (10.98).

**Ni(L3) (3)** In a 25 mL round-bottom flask, 119 mg (0.5 mmol, 1 eq.) of NiCl<sub>2</sub>•6H<sub>2</sub>O was dissolved in 10 mL of MeCN, followed by 216 mg (1.5 mmol, 3 eq.) of 3,4-hexanedione-dioxime, producing a maroon solution. This solution was heated at reflux for one hour under N<sub>2</sub>, followed by the addition of 121 mg (1.0 mmol, 2 eq.) of phenylboronic acid. The subsequent solution was then refluxed for two days, while remaining under N<sub>2</sub>. After this time, a light green precipitant was observable in the reaction flask. The solution was cooled to room temperature and filtered open to air. The resulting light green powder was washed with MeCN (3 × 5 mL) followed by ethyl ether (3 × 10 mL) and dried overnight in a vacuum oven at 70°C. The final yield was 281 mg (85%) of **3**. Crystals suitable for single crystal x-ray diffraction were grown by layering a saturated methylene chloride solution of **3** with ethyl ether. IR (cm<sup>-1</sup>, diamond ATR): 2976, 2940, 2876, 1612, 1461, 1433, 1218, 1179, 1105, 1055, 1016, 950, 899, 816, 745, 705, 651, 577, 492. UV-vis (H<sub>2</sub>O); λ<sub>max</sub> (ε<sub>M</sub>, M<sup>-1</sup>cm<sup>-1</sup>): 772 nm (55.5); LC-MS (m/z): positive ion mode: {H[Ni(L3)]}<sup>+</sup>, 661.25. Elemental analysis for C<sub>30</sub>H<sub>40</sub>B<sub>2</sub>N<sub>6</sub>NiO<sub>6</sub> calculated (found): %C: 54.51 (54.19), %H: 6.10 (5.92), %N: 12.71 (12.63).

**Ni(L4)•2.5H<sub>2</sub>O (4)** In a N<sub>2</sub> glove box, 200 mg (0.91 mmol, 1 eq.) of NiCl<sub>2</sub>•DME was dissolved in 10 mL of MeNO<sub>2</sub> in a 25 mL Schlenk flask, followed by 241 mg (2.73 mmol, 3 eq.) of glyoxime, and 221 mg (1.82 mmol, 2 eq.) of phenylboronic acid. The reaction vessel was removed from the glovebox and affixed to a Schlenk line under N<sub>2</sub>. The solution was heated at reflux for four days.

The solution was then cooled to room temperature and filtered open to air. The resulting light green powder was washed with MeOH (3 × 5 mL) followed by ethyl ether (3 × 10 mL) and dried overnight in a vacuum oven at 70°C. The final yield was 319 mg (65%) of **4**. Crystals suitable for single crystal x-ray diffraction were grown by vapor diffusion of ethyl ether into a saturated 1,4-dioxane solution of **4**. IR (cm<sup>-1</sup>, diamond ATR): 3054, 3015, 2963, 2852, 1596, 1499, 1433, 1281, 1260, 1260, 1217, 1131, 1095, 943, 890, 847, 823, 754, 721, 700, 585. UV-vis (H<sub>2</sub>O); λ<sub>max</sub> (ε<sub>M</sub>, M<sup>-1</sup>cm<sup>-1</sup>): 764 nm (29.2); LC-MS (m/z): positive ion mode: {H[Ni(L4)]}<sup>+</sup>, 493.07. Elemental analysis for C<sub>18</sub>H<sub>16</sub>B<sub>2</sub>N<sub>6</sub>NiO<sub>6</sub>•2.5H<sub>2</sub>O calculated (found): %C: 40.21 (40.42), %H: 3.94 (3.55), %N: 15.63 (15.41).

**Ni(L5) (5)** In a N<sub>2</sub> glove box, 110 mg (0.5 mmol, 1 eq.) of NiCl<sub>2</sub>•DME was dissolved in 10 mL of MeNO<sub>2</sub> in a 25 mL Schlenk flask, followed by 235 mg (1.5 mmol, 3 eq.) of dichloroglyoxime, and 122 mg (1.0 mmol, 2 eq.) of phenylboronic acid. The reaction vessel was removed from the glovebox and affixed to a Schlenk line under N<sub>2</sub>. The solution was heated at reflux for two days. The solution was then cooled to room temperature and filtered open to air. The resulting light green powder was washed with MeOH (3 × 5 mL) followed by ethyl ether (3 × 10 mL) and dried overnight in a vacuum oven at 70°C. The final yield was 326 mg (93%) of **5**. Crystals suitable for single crystal x-ray diffraction were grown by vapor diffusion of ethyl ether into a saturated dichloromethane solution of **5**. IR (cm<sup>-1</sup>, diamond ATR): 3074, 3054, 3014, 1562, 1433, 1260, 1224, 1148, 1081, 959, 910, 883, 946, 761, 704, 657, 532. UV-vis (H<sub>2</sub>O); λ<sub>max</sub> (ε<sub>M</sub>, M<sup>-1</sup>cm<sup>-1</sup>): 838 nm (44.2). Elemental analysis for C<sub>18</sub>H<sub>10</sub>B<sub>2</sub>N<sub>6</sub>NiO<sub>6</sub> calculated (found): %C: 30.62 (30.67), %H: 1.44 (1.33), %N: 12.02 (11.79).

**X-ray Data Collection, Structure Solution and Refinement for 1-5.** The diffraction data were collected at the X-Ray Diffraction facility of the Analytical Resources Core at Colorado State University. Data for **1-5** were collected on a Bruker D8 Quest ECO single-crystal X-ray diffractometer equipped with Mo Kα (λ = 0.71073 Å). Data were collected and integrated using Bruker Apex 3 software. Absorption correction were applied using SADABS.<sup>4</sup> Space group assignments were determined by examination of systematic absences, E7 statistics, and successive refinement of the structures. Crystal structures were solved using SHELXT and refined with the aid of successive difference Fourier maps by SHELXL operated in conjunction with OLEX2 software.<sup>5-7</sup> None of the crystals demonstrated decay by X-ray radiation over the course of the

experiment. Hydrogen atoms were placed in ideal positions and refined using a riding model for all structures. In **1**, two disordered carbon atoms in one of the ethyl side-arms were modeled with fixed occupancies of 0.50 and 0.50, and 0.67 and 0.33. Crystallographic information files for **1-5** are available in the CSD at accession numbers 2086087-2086091.

**Magnetic Measurements.** Magnetic data were collected on a Quantum Design MPMS SQUID magnetometer. Microcrystalline samples of **1-5** were pulverized and placed into a gelatin capsule then restrained with molten eicosane. Direct current (dc) measurements were obtained with 1000, 5000, 10000, and 30000 G applied fields with temperatures ranging from 1.8 to 300 K. All dc measurements were corrected for the diamagnetic contribution of the sample holder, as well as the restraining material and ligand framework (calculated using Pascal's constants).<sup>8</sup>

**Computational Details.** All computations were carried out using Orca 4.11 software package.<sup>9</sup> Experimental single crystal X-ray diffraction structures were used as the starting geometries for all computations with all C–H bonds modified to 1.09 Å. Initial orbital energies were generated via DFT (B3LYP functional)<sup>10</sup> using the SVP basis set,<sup>11</sup> RIJCOSX approximation,<sup>12,13</sup> and unrestricted natural orbitals (UNOs). With respects to the five 3d-orbitals and eight electrons of nickel(II), complete active space self-consistent field (CASSCF)<sup>14,15</sup> calculations were performed with the UNOs to yield zero-field splitting parameters, including  $D$  and  $g_{\text{iso}}$ . The %CASSCF block included triplet and singlet multiplets with 10 and 15 excitations, respectively. Additionally, calculations were completed including relativistic effects, spin-orbit coupling, and spin-spin coupling, and convergence followed using the SOSCF switchstep. Ab initio ligand field theory calculations (AILFT)<sup>16,17</sup> were complete starting from successfully converged CASSCF outputs via MOREAD function and included NEVPT2<sup>18-20</sup> treatment.

**Electron Paramagnetic Resonance.** EPR spectra collected herein were simulated using Easyspin<sup>21</sup> with the function Pepper (frozen solution and solid powder) and were refined using simulations of the experimental data. All samples were prepared at atmospheric conditions as 5 mM solutions in a glassing mixture of chloroform and toluene (1:1 v/v) the same day the measurements took place. X-band CW EPR data were collected on a Bruker ESR-300 spectrometer equipped with a ColdEdge liquid helium cryostat and the Bruker ER 4116DM dual-

mode resonator. No signal that could be attributed to any of the nickel complexes studied was found under these conditions.

**Other Physical Measurements.** Elemental analyses were performed by Roberson Microlit Laboratories (Ledgewood, New Jersey, USA). Infrared spectra were recorded on a Nicolet 6700 FTIR spectrometer using a diamond window ATR. Electronic absorption spectra of all complexes were recorded on aqueous with a Hewlett-Packard 8453 spectrophotometer using standard quartz cuvettes with a 1 cm path length. Mass spectral analyses were performed on an Agilent 6224 Accurate Mass TOF LC/MS in positive ion mode using direct injection. Peak assignment was on the basis of  $m/z$ , interpeak spacing, and isotopic distribution.

**Table S1.** Crystallographic information for the structural refinement of **1**.

---

|                                                              |                                                                                                |
|--------------------------------------------------------------|------------------------------------------------------------------------------------------------|
| Empirical formula                                            | C <sub>30</sub> H <sub>30</sub> B <sub>2</sub> F <sub>10</sub> N <sub>6</sub> NiO <sub>6</sub> |
| Formula weight                                               | 840.96 g/mol                                                                                   |
| Temperature                                                  | 104.13 K                                                                                       |
| Crystal system                                               | Triclinic                                                                                      |
| Space group                                                  | P-1                                                                                            |
| <i>a</i>                                                     | 11.7082(3) Å                                                                                   |
| <i>b</i>                                                     | 12.2248(3) Å                                                                                   |
| <i>c</i>                                                     | 13.9254(4) Å                                                                                   |
| $\alpha$                                                     | 67.6230(10)°                                                                                   |
| $\beta$                                                      | 88.3260(10)°                                                                                   |
| $\gamma$                                                     | 71.7290(10)°                                                                                   |
| Volume                                                       | 1740.90(8) Å <sup>3</sup>                                                                      |
| <i>Z</i>                                                     | 2                                                                                              |
| $\rho_{\text{calc}}$                                         | 1.604 g cm <sup>-3</sup>                                                                       |
| $\mu$                                                        | 0.663 mm <sup>-1</sup>                                                                         |
| F(000)                                                       | 856.0                                                                                          |
| Crystal color                                                | Green                                                                                          |
| Crystal size                                                 | 0.138 × 0.061 × 0.031 mm <sup>3</sup>                                                          |
| Radiation                                                    | MoK $\alpha$ ( $\lambda$ = 0.71073 Å)                                                          |
| 2 $\theta$ range for data collection                         | 3.18 to 52.74°                                                                                 |
| Index ranges                                                 | -14 ≤ <i>h</i> ≤ 14, -15 ≤ <i>k</i> ≤ 15, -17 ≤ <i>l</i> ≤ 17                                  |
| Reflections collected                                        | 96824                                                                                          |
| Independent collections                                      | 7132 [ <i>R</i> <sub>int</sub> = 0.0783, <i>R</i> <sub>sigma</sub> = 0.0276]                   |
| Data/restraints/parameters                                   | 7132/0/501                                                                                     |
| Goodness-of-fit on <i>F</i> <sup>2</sup>                     | 1.134                                                                                          |
| Final <i>R</i> indexes [ <i>I</i> ≥ 2 $\sigma$ ( <i>I</i> )] | <i>R</i> <sub>1</sub> = 0.0431, <i>wR</i> <sub>2</sub> = 0.1100                                |
| Final <i>R</i> indexes [all data]                            | <i>R</i> <sub>1</sub> = 0.0576, <i>wR</i> <sub>2</sub> = 0.1261                                |
| Largest diff. peak/hole                                      | 1.74/-0.67 e Å <sup>-3</sup>                                                                   |



**Table S2.** Crystallographic information for the structural refinement of **2**.

---

|                                                              |                                                                                 |
|--------------------------------------------------------------|---------------------------------------------------------------------------------|
| Empirical formula                                            | C <sub>34</sub> H <sub>46</sub> B <sub>2</sub> N <sub>6</sub> NiO <sub>10</sub> |
| Formula weight                                               | 779.10 g/mol                                                                    |
| Temperature                                                  | 100.01 K                                                                        |
| Crystal system                                               | Monoclinic                                                                      |
| Space group                                                  | C2/c                                                                            |
| <i>a</i>                                                     | 26.8983(12) Å                                                                   |
| <i>b</i>                                                     | 8.7226(4) Å                                                                     |
| <i>c</i>                                                     | 17.7343(7) Å                                                                    |
| $\alpha$                                                     | 90°                                                                             |
| $\beta$                                                      | 117.800(2)°                                                                     |
| $\gamma$                                                     | 90°                                                                             |
| Volume                                                       | 3680.6(3) Å <sup>3</sup>                                                        |
| <i>Z</i>                                                     | 4                                                                               |
| $\rho_{\text{calc}}$                                         | 1.406 g cm <sup>-3</sup>                                                        |
| $\mu$                                                        | 0.592 mm <sup>-1</sup>                                                          |
| F(000)                                                       | 1640.0                                                                          |
| Crystal color                                                | Green                                                                           |
| Crystal size                                                 | 0.268 × 0.127 × 0.029 mm <sup>3</sup>                                           |
| Radiation                                                    | MoK $\alpha$ ( $\lambda$ = 0.71073 Å)                                           |
| 2 $\theta$ range for data collection                         | 3.424 to 49.418°                                                                |
| Index ranges                                                 | -31 ≤ <i>h</i> ≤ 31, -10 ≤ <i>k</i> ≤ 10, -20 ≤ <i>l</i> ≤ 20                   |
| Reflections collected                                        | 45379                                                                           |
| Independent collections                                      | 3142 [ <i>R</i> <sub>int</sub> = 0.1308, <i>R</i> <sub>sigma</sub> = 0.0424]    |
| Data/restraints/parameters                                   | 3142/0/245                                                                      |
| Goodness-of-fit on <i>F</i> <sup>2</sup>                     | 1.109                                                                           |
| Final <i>R</i> indexes [ <i>I</i> ≥ 2 $\sigma$ ( <i>I</i> )] | <i>R</i> <sub>1</sub> = 0.0673, <i>wR</i> <sub>2</sub> = 0.1695                 |
| Final <i>R</i> indexes [all data]                            | <i>R</i> <sub>1</sub> = 0.0899, <i>wR</i> <sub>2</sub> = 0.1899                 |
| Largest diff. peak/hole                                      | 1.55/-0.84 e Å <sup>-3</sup>                                                    |

**Table S3.** Crystallographic information for the structural refinement of **3**.

|                                                              |                                                                                                |
|--------------------------------------------------------------|------------------------------------------------------------------------------------------------|
| Empirical formula                                            | C <sub>31</sub> H <sub>42</sub> B <sub>2</sub> Cl <sub>2</sub> N <sub>6</sub> NiO <sub>6</sub> |
| Formula weight                                               | 745.92 g/mol                                                                                   |
| Temperature                                                  | 100.02 K                                                                                       |
| Crystal system                                               | Triclinic                                                                                      |
| Space group                                                  | P1                                                                                             |
| <i>a</i>                                                     | 8.7045(3) Å                                                                                    |
| <i>b</i>                                                     | 12.6193(5) Å                                                                                   |
| <i>c</i>                                                     | 16.8514(6) Å                                                                                   |
| $\alpha$                                                     | 108.029(2)°                                                                                    |
| $\beta$                                                      | 91.507(2)°                                                                                     |
| $\gamma$                                                     | 100.848(2)°                                                                                    |
| Volume                                                       | 1721.60(11) Å <sup>3</sup>                                                                     |
| <i>Z</i>                                                     | 2                                                                                              |
| $\rho_{\text{calc}}$                                         | 1.439 g cm <sup>-3</sup>                                                                       |
| $\mu$                                                        | 0.771 mm <sup>-1</sup>                                                                         |
| F(000)                                                       | 780.0                                                                                          |
| Crystal color                                                | Green                                                                                          |
| Crystal size                                                 | 0.256 × 0.043 × 0.037 mm <sup>3</sup>                                                          |
| Radiation                                                    | MoK $\alpha$ ( $\lambda$ = 0.71073 Å)                                                          |
| 2 $\theta$ range for data collection                         | 3.468 to 52.742°                                                                               |
| Index ranges                                                 | -10 ≤ <i>h</i> ≤ 10, -15 ≤ <i>k</i> ≤ 15, -21 ≤ <i>l</i> ≤ 21                                  |
| Reflections collected                                        | 49643                                                                                          |
| Independent collections                                      | 14052 [ <i>R</i> <sub>int</sub> = 0.0612, <i>R</i> <sub>sigma</sub> = 0.0586]                  |
| Data/restraints/parameters                                   | 14052/3/877                                                                                    |
| Goodness-of-fit on <i>F</i> <sup>2</sup>                     | 1.098                                                                                          |
| Final <i>R</i> indexes [ <i>I</i> ≥ 2 $\sigma$ ( <i>I</i> )] | <i>R</i> <sub>1</sub> = 0.0408, <i>wR</i> <sub>2</sub> = 0.0908                                |
| Final <i>R</i> indexes [all data]                            | <i>R</i> <sub>1</sub> = 0.0565, <i>wR</i> <sub>2</sub> = 0.1049                                |
| Largest diff. peak/hole                                      | 0.44/-0.57 e Å <sup>-3</sup>                                                                   |
| Flack parameter                                              | 0.387(6)                                                                                       |

**Table S4.** Crystallographic information for the structural refinement of **4**.

---

|                                                              |                                                                                |
|--------------------------------------------------------------|--------------------------------------------------------------------------------|
| Empirical formula                                            | C <sub>18</sub> H <sub>16</sub> B <sub>2</sub> N <sub>6</sub> NiO <sub>6</sub> |
| Formula weight                                               | 492.68 g/mol                                                                   |
| Temperature                                                  | 214.44 K                                                                       |
| Crystal system                                               | Monoclinic                                                                     |
| Space group                                                  | P2 <sub>1</sub> /c                                                             |
| <i>a</i>                                                     | 11.291(6) Å                                                                    |
| <i>b</i>                                                     | 11.251(4) Å                                                                    |
| <i>c</i>                                                     | 15.826(6) Å                                                                    |
| $\alpha$                                                     | 90°                                                                            |
| $\beta$                                                      | 104.49(2)°                                                                     |
| $\gamma$                                                     | 90°                                                                            |
| Volume                                                       | 1946.5(15) Å <sup>3</sup>                                                      |
| <i>Z</i>                                                     | 4                                                                              |
| $\rho_{\text{calc}}$                                         | 1.681 g cm <sup>-3</sup>                                                       |
| $\mu$                                                        | 1.051 mm <sup>-1</sup>                                                         |
| F(000)                                                       | 1008.0                                                                         |
| Crystal color                                                | Green                                                                          |
| Crystal size                                                 | 0.102 × 0.065 × 0.032 mm <sup>3</sup>                                          |
| Radiation                                                    | MoK $\alpha$ ( $\lambda$ = 0.71073 Å)                                          |
| 2 $\theta$ range for data collection                         | 3.726 to 52.04°                                                                |
| Index ranges                                                 | -13 ≤ <i>h</i> ≤ 13, -13 ≤ <i>k</i> ≤ 13, -19 ≤ <i>l</i> ≤ 19                  |
| Reflections collected                                        | 74743                                                                          |
| Independent collections                                      | 3824 [ <i>R</i> <sub>int</sub> = 0.0838, <i>R</i> <sub>sigma</sub> = 0.0247]   |
| Data/restraints/parameters                                   | 3824/0/298                                                                     |
| Goodness-of-fit on <i>F</i> <sup>2</sup>                     | 1.222                                                                          |
| Final <i>R</i> indexes [ <i>I</i> ≥ 2 $\sigma$ ( <i>I</i> )] | <i>R</i> <sub>1</sub> = 0.0306, <i>wR</i> <sub>2</sub> = 0.0813                |
| Final <i>R</i> indexes [all data]                            | <i>R</i> <sub>1</sub> = 0.0442, <i>wR</i> <sub>2</sub> = 0.0995                |
| Largest diff. peak/hole                                      | 0.61/-0.60 e Å <sup>-3</sup>                                                   |

**Table S5.** Crystallographic information for the structural refinement of **5**.

|                                                              |                                                                                                |
|--------------------------------------------------------------|------------------------------------------------------------------------------------------------|
| Empirical formula                                            | C <sub>18</sub> H <sub>10</sub> B <sub>2</sub> Cl <sub>6</sub> N <sub>6</sub> NiO <sub>6</sub> |
| Formula weight                                               | 699.35 g/mol                                                                                   |
| Temperature                                                  | 110.22 K                                                                                       |
| Crystal system                                               | Triclinic                                                                                      |
| Space group                                                  | P-1                                                                                            |
| <i>a</i>                                                     | 8.1747(10) Å                                                                                   |
| <i>b</i>                                                     | 12.442(2) Å                                                                                    |
| <i>c</i>                                                     | 13.2849(18) Å                                                                                  |
| $\alpha$                                                     | 96.637(7)°                                                                                     |
| $\beta$                                                      | 103.105(9)°                                                                                    |
| $\gamma$                                                     | 108.640(7)°                                                                                    |
| Volume                                                       | 1220.8(3) Å <sup>3</sup>                                                                       |
| <i>Z</i>                                                     | 2                                                                                              |
| $\rho_{\text{calc}}$                                         | 1.903 g cm <sup>-3</sup>                                                                       |
| $\mu$                                                        | 1.503 mm <sup>-1</sup>                                                                         |
| F(000)                                                       | 696.0                                                                                          |
| Crystal color                                                | Green                                                                                          |
| Crystal size                                                 | 0.052 × 0.046 × 0.035 mm <sup>3</sup>                                                          |
| Radiation                                                    | MoK $\alpha$ ( $\lambda$ = 0.71073 Å)                                                          |
| 2 $\theta$ range for data collection                         | 3.216 to 52.988°                                                                               |
| Index ranges                                                 | -10 ≤ <i>h</i> ≤ 10, -15 ≤ <i>k</i> ≤ 15, -16 ≤ <i>l</i> ≤ 16                                  |
| Reflections collected                                        | 52346                                                                                          |
| Independent collections                                      | 5031 [ <i>R</i> <sub>int</sub> = 0.1056, <i>R</i> <sub>sigma</sub> = 0.0477]                   |
| Data/restraints/parameters                                   | 5031/0/352                                                                                     |
| Goodness-of-fit on <i>F</i> <sup>2</sup>                     | 1.044                                                                                          |
| Final <i>R</i> indexes [ <i>I</i> ≥ 2 $\sigma$ ( <i>I</i> )] | <i>R</i> <sub>1</sub> = 0.0428, <i>wR</i> <sub>2</sub> = 0.0957                                |
| Final <i>R</i> indexes [all data]                            | <i>R</i> <sub>1</sub> = 0.0649, <i>wR</i> <sub>2</sub> = 0.1043                                |
| Largest diff. peak/hole                                      | 1.24/-0.40 e Å <sup>-3</sup>                                                                   |

**Table S6.** Contributions to  $D$  respective of triplet ( $T$ ) and singlet ( $S$ ) excited states in each complex and their respective energies.

| State | 1                                   |                                | 2                                   |                                | 3                                   |                                | 4                                   |                                | 5                                   |                                |
|-------|-------------------------------------|--------------------------------|-------------------------------------|--------------------------------|-------------------------------------|--------------------------------|-------------------------------------|--------------------------------|-------------------------------------|--------------------------------|
|       | Contrib. to $D$ (cm <sup>-1</sup> ) | $\Delta E$ (cm <sup>-1</sup> ) | Contrib. to $D$ (cm <sup>-1</sup> ) | $\Delta E$ (cm <sup>-1</sup> ) | Contrib. to $D$ (cm <sup>-1</sup> ) | $\Delta E$ (cm <sup>-1</sup> ) | Contrib. to $D$ (cm <sup>-1</sup> ) | $\Delta E$ (cm <sup>-1</sup> ) | Contrib. to $D$ (cm <sup>-1</sup> ) | $\Delta E$ (cm <sup>-1</sup> ) |
| $T1$  | -7.38                               | 11168.9                        | -1.94                               | 10532.7                        | -12.12                              | 11379.4                        | -11.96                              | 11446.1                        | -6.49                               | 10310.1                        |
| $T2$  | 18.84                               | 12159.4                        | 1.99                                | 10829.0                        | 18.17                               | 12366.0                        | 21.11                               | 12227.3                        | 19.69                               | 10888.1                        |
| $T3$  | 17.54                               | 12425.4                        | 23.24                               | 11584.8                        | 19.63                               | 12493.8                        | 20.53                               | 12326.7                        | 19.33                               | 11541.6                        |
| $T4$  | 3.17                                | 12613.6                        | 22.40                               | 11620.7                        | 0.66                                | 13371                          | 0.10                                | 13062.2                        | 5.89                                | 11572.5                        |
| $S2$  | -5.27                               | 24777.8                        | -5.04                               | 23927.6                        | -5.13                               | 25323.2                        | -5.44                               | 25081.5                        | -5.48                               | 24368.1                        |
| $S3$  | -5.10                               | 25247.5                        | -4.96                               | 24148.4                        | -5.32                               | 25705.1                        | -5.37                               | 25616.6                        | -5.02                               | 24275.3                        |
| $S4$  | 16.73                               | 25383.1                        | 19.01                               | 24151.3                        | 15.30                               | 25824.7                        | 16.17                               | 25670.4                        | 17.41                               | 24407.3                        |

**Table S7.** Multiconfiguration coefficients for **1**.<sup>a</sup>

| Excitation Configurations of <b>1</b> |         |       |         |       |         |       |         |       |         |       |         |       |         |
|---------------------------------------|---------|-------|---------|-------|---------|-------|---------|-------|---------|-------|---------|-------|---------|
| $T1$                                  |         | $T2$  |         | $T3$  |         | $T4$  |         | $S2$  |         | $S3$  |         | $S4$  |         |
| A                                     | config. | A     | config. | A     | config. | A     | config. | A     | config. | A     | config. | A     | config. |
| 0.226                                 | 22211   | 0.614 | 12122   | 0.455 | 21212   | 0.476 | 22121   | 0.382 | 12122   | 0.139 | 22220   | 0.250 | 22211   |
| 0.153                                 | 22121   | 0.103 | 21212   | 0.159 | 11222   | 0.211 | 22211   | 0.160 | 22211   | 0.133 | 22022   | 0.172 | 22022   |
| 0.144                                 | 12212   | 0.088 | 12221   | 0.144 | 22121   | 0.105 | 12221   | 0.121 | 11222   | 0.125 | 21212   | 0.107 | 22121   |
| 0.139                                 | 21221   | 0.066 | 22111   | 0.109 | 12212   | 0.062 | 12122   | 0.111 | 22202   | 0.124 | 22121   | 0.101 | 12212   |
| 0.117                                 | 12122   | 0.055 | 11222   | 0.080 | 21221   | 0.057 | 11222   | 0.069 | 21221   | 0.098 | 12212   | 0.090 | 11222   |
| 0.100                                 | 22112   | 0.038 | 12212   | 0.024 | 12221   | 0.033 | 21122   | 0.054 | 22220   | 0.081 | 20222   | 0.074 | 21122   |
| 0.063                                 | 21212   | 0.024 | 22211   | 0.019 | 22112   | 0.020 | 12212   | 0.039 | 22121   | 0.075 | 02222   | 0.069 | 22202   |
| 0.052                                 | 21122   | 0.008 | 22121   | 0.009 | 22211   | 0.019 | 21221   | 0.036 | 21212   | 0.065 | 22112   | 0.037 | 12221   |
| 0.004                                 | 12221   |       |         |       |         | 0.015 | 21212   | 0.010 | 12221   | 0.059 | 21221   | 0.032 | 02222   |
|                                       |         |       |         |       |         |       |         | 0.007 | 20222   | 0.055 | 12122   | 0.020 | 12122   |
|                                       |         |       |         |       |         |       |         | 0.005 | 12212   | 0.024 | 12221   | 0.014 | 21212   |
|                                       |         |       |         |       |         |       |         | 0.004 | 22112   | 0.011 | 21122   | 0.014 | 22220   |
|                                       |         |       |         |       |         |       |         |       |         | 0.007 | 22211   | 0.011 | 22112   |
|                                       |         |       |         |       |         |       |         |       |         | 0.004 | 11222   | 0.007 | 21221   |

<sup>a</sup>. Configurations here are listed as occupancy of  $d$  orbitals, with increasing energy from left to right. For example, in the  $T1$  column above, “22211” indicates a configuration of  $(d_{z^2})^2(d_{x^2-y^2})^2(d_{xy})^2(d_{xz})^1(d_{yz})^1$ , like depicted in Fig. 3c of the main text, and the “A” number of 0.226 indicates the contribution of that configuration to the  $T1$  state.

**Table S8.** Multiconfiguration coefficients for **2**.

| Excitation Configurations of <b>2</b> |                |           |                |           |                |           |                |           |                |           |                |           |                |
|---------------------------------------|----------------|-----------|----------------|-----------|----------------|-----------|----------------|-----------|----------------|-----------|----------------|-----------|----------------|
| <b>T1</b>                             |                | <b>T2</b> |                | <b>T3</b> |                | <b>T4</b> |                | <b>S2</b> |                | <b>S3</b> |                | <b>S4</b> |                |
| <i>A</i>                              | <i>config.</i> | <i>A</i>  | <i>config.</i> | <i>A</i>  | <i>config.</i> | <i>A</i>  | <i>config.</i> | <i>A</i>  | <i>config.</i> | <i>A</i>  | <i>config.</i> | <i>A</i>  | <i>config.</i> |
| 0.352                                 | 12122          | 0.436     | 11222          | 0.476     | 21212          | 0.451     | 21221          | 0.554     | 11222          | 0.200     | 02222          | 0.324     | 21212          |
| 0.340                                 | 21212          | 0.198     | 22112          | 0.273     | 22121          | 0.275     | 12212          | 0.352     | 22211          | 0.178     | 20222          | 0.217     | 12221          |
| 0.247                                 | 12221          | 0.183     | 22211          | 0.249     | 12122          | 0.224     | 11222          | 0.073     | 22112          | 0.149     | 22022          | 0.213     | 12122          |
| 0.061                                 | 22121          | 0.104     | 12212          |           |                | 0.020     | 22112          | 0.014     | 21221          | 0.133     | 22202          | 0.176     | 20222          |
|                                       |                | 0.054     | 21221          |           |                | 0.019     | 22211          | 0.007     | 12212          | 0.123     | 22121          | 0.041     | 22202          |
|                                       |                | 0.025     | 21122          |           |                | 0.011     | 21122          |           |                | 0.109     | 21212          | 0.024     | 22220          |
|                                       |                |           |                |           |                |           |                |           |                | 0.084     | 12221          | 0.004     | 22121          |
|                                       |                |           |                |           |                |           |                |           |                | 0.023     | 12122          |           |                |

<sup>a</sup>. Configurations here are listed as occupancy of *d* orbitals, with increasing energy from left to right. For example, at the top of the *T1* column above, “12122” indicates a configuration of  $(d_{z^2})^1(d_{x^2-y^2})^2(d_{xy})^1(d_{xz})^2(d_{yz})^2$ , and the “A” number of 0.352 indicates the contribution of that configuration to the *T1* state.

**Table S9.** Multiconfiguration Coefficients for **3**.

| Excitation Configurations of <b>3</b> |                |           |                |           |                |           |                |           |                |           |                |           |                |
|---------------------------------------|----------------|-----------|----------------|-----------|----------------|-----------|----------------|-----------|----------------|-----------|----------------|-----------|----------------|
| <b>T1</b>                             |                | <b>T2</b> |                | <b>T3</b> |                | <b>T4</b> |                | <b>S2</b> |                | <b>S3</b> |                | <b>S4</b> |                |
| <i>A</i>                              | <i>config.</i> | <i>A</i>  | <i>config.</i> | <i>A</i>  | <i>config.</i> | <i>A</i>  | <i>config.</i> | <i>A</i>  | <i>config.</i> | <i>A</i>  | <i>config.</i> | <i>A</i>  | <i>config.</i> |
| 0.550                                 | 21221          | 0.435     | 21212          | 0.531     | 12122          | 0.408     | 22121          | 0.146     | 12122          | 0.186     | 21212          | 0.373     | 21221          |
| 0.193                                 | 12122          | 0.245     | 12122          | 0.182     | 21221          | 0.234     | 12221          | 0.134     | 21221          | 0.143     | 12122          | 0.340     | 12122          |
| 0.136                                 | 12212          | 0.172     | 12221          | 0.149     | 21212          | 0.098     | 22211          | 0.131     | 21212          | 0.113     | 12221          | 0.100     | 02222          |
| 0.041                                 | 11222          | 0.086     | 22211          | 0.050     | 22211          | 0.088     | 11222          | 0.125     | 22121          | 0.107     | 22121          | 0.081     | 12212          |
| 0.036                                 | 22121          | 0.034     | 21122          | 0.030     | 12221          | 0.075     | 21122          | 0.110     | 22220          | 0.095     | 11222          | 0.063     | 20222          |
| 0.028                                 | 12221          | 0.014     | 21221          | 0.024     | 21122          | 0.068     | 21221          | 0.097     | 12221          | 0.086     | 22220          | 0.020     | 22112          |
| 0.007                                 | 21212          | 0.013     | 22112          | 0.018     | 12212          | 0.015     | 12212          | 0.068     | 02222          | 0.078     | 22211          | 0.012     | 22220          |
| 0.006                                 | 22112          |           |                | 0.010     | 22112          | 0.010     | 21212          | 0.059     | 22022          | 0.076     | 21221          | 0.003     | 12221          |
|                                       |                |           |                | 0.005     | 22121          |           |                | 0.054     | 20222          | 0.043     | 22022          |           |                |
|                                       |                |           |                |           |                |           |                | 0.036     | 22211          | 0.025     | 22112          |           |                |
|                                       |                |           |                |           |                |           |                | 0.015     | 22112          | 0.017     | 21122          |           |                |
|                                       |                |           |                |           |                |           |                | 0.011     | 11222          | 0.013     | 02222          |           |                |
|                                       |                |           |                |           |                |           |                | 0.009     | 21122          | 0.011     | 20222          |           |                |
|                                       |                |           |                |           |                |           |                | 0.004     | 22202          | 0.007     | 22202          |           |                |
|                                       |                |           |                |           |                |           |                | 0.003     | 12212          |           |                |           |                |

<sup>a</sup>. Configurations here are listed as occupancy of *d* orbitals, with increasing energy from left to right. For example, at the top of the *T1* column above, “21221” indicates a configuration of  $(d_{z^2})^2(d_{x^2-y^2})^1(d_{xy})^2(d_{xz})^2(d_{yz})^1$  and the “A” number of 0.550 indicates the contribution of that configuration to the *T1* state.

**Table S10.** Multiconfiguration coefficients for 4.<sup>a</sup>

| Excitation Configurations of 4 |                         |                         |                         |                         |                         |                         |
|--------------------------------|-------------------------|-------------------------|-------------------------|-------------------------|-------------------------|-------------------------|
| <i>T1</i>                      | <i>T2</i>               | <i>T3</i>               | <i>T4</i>               | <i>S2</i>               | <i>S3</i>               | <i>S4</i>               |
| <i>A</i> <i>config.</i>        | <i>A</i> <i>config.</i> | <i>A</i> <i>config.</i> | <i>A</i> <i>config.</i> | <i>A</i> <i>config.</i> | <i>A</i> <i>config.</i> | <i>A</i> <i>config.</i> |
| 0.277 21212                    | 0.415 12122             | 0.372 22211             | 0.374 22112             | 0.234 12122             | 0.320 21221             | 0.365 21212             |
| 0.236 12122                    | 0.227 21212             | 0.281 11222             | 0.225 21212             | 0.216 22202             | 0.258 22112             | 0.161 22121             |
| 0.165 22112                    | 0.119 12221             | 0.104 21122             | 0.143 12212             | 0.131 21222             | 0.200 12212             | 0.132 02222             |
| 0.113 11222                    | 0.092 22211             | 0.062 22121             | 0.095 22121             | 0.078 22112             | 0.064 11222             | 0.103 12122             |
| 0.107 21221                    | 0.040 22121             | 0.055 21221             | 0.089 11222             | 0.071 22022             | 0.047 22022             | 0.055 22202             |
| 0.069 22121                    | 0.040 22112             | 0.051 12221             | 0.024 21122             | 0.068 22121             | 0.026 22202             | 0.052 22112             |
| 0.024 12221                    | 0.032 12212             | 0.043 22112             | 0.021 21221             | 0.057 02222             | 0.024 22211             | 0.039 11222             |
| 0.005 22211                    | 0.022 21122             | 0.026 21212             | 0.016 12221             | 0.041 11222             | 0.015 21212             | 0.034 12221             |
| 0.003 12212                    | 0.007 21221             | 0.003 12212             | 0.015 12122             | 0.035 22211             | 0.015 12122             | 0.028 22022             |
|                                | 0.007 11222             |                         |                         | 0.034 12212             | 0.010 02222             | 0.010 20222             |
|                                |                         |                         |                         | 0.012 21221             | 0.010 12221             | 0.007 21122             |
|                                |                         |                         |                         | 0.009 12221             | 0.007 21122             | 0.005 22211             |
|                                |                         |                         |                         | 0.009 21212             | 0.003 20222             | 0.004 12212             |
|                                |                         |                         |                         | 0.005 22220             |                         | 0.004 22220             |

<sup>a</sup>. Configurations here are listed as occupancy of *d* orbitals, with increasing energy from left to right. For example, at the top of the *T1* column above, “21212” indicates a configuration of  $(d_{z^2})^2(d_{x^2-y^2})^1(d_{xy})^2(d_{xz})^1(d_{yz})^2$  and the “A” number of 0.277 indicates the contribution of that configuration to the *T1* state.

**Table S11.** Multiconfiguration coefficients for 5.<sup>a</sup>

| Excitation Configurations of 5 |                         |                         |                         |                         |                         |                         |
|--------------------------------|-------------------------|-------------------------|-------------------------|-------------------------|-------------------------|-------------------------|
| <i>T1</i>                      | <i>T2</i>               | <i>T3</i>               | <i>T4</i>               | <i>S2</i>               | <i>S3</i>               | <i>S4</i>               |
| <i>A</i> <i>config.</i>        | <i>A</i> <i>config.</i> | <i>A</i> <i>config.</i> | <i>A</i> <i>config.</i> | <i>A</i> <i>config.</i> | <i>A</i> <i>config.</i> | <i>A</i> <i>config.</i> |
| 0.681 21221                    | 0.606 22121             | 0.504 22112             | 0.689 21212             | 0.381 22121             | 0.430 21221             | 0.378 22202             |
| 0.272 22112                    | 0.269 12221             | 0.289 12212             | 0.099 22121             | 0.337 21212             | 0.347 22112             | 0.251 22220             |
| 0.023 12212                    | 0.055 22211             | 0.097 21221             | 0.084 12221             | 0.107 22211             | 0.100 12212             | 0.165 22022             |
| 0.016 11222                    | 0.039 21212             | 0.046 21212             | 0.079 22211             | 0.101 12221             | 0.050 22220             | 0.159 20222             |
| 0.003 22211                    | 0.023 12122             | 0.024 12122             | 0.019 22112             | 0.026 11222             | 0.028 22202             | 0.012 21212             |
| 0.003 21212                    | 0.003 21221             | 0.013 22121             | 0.012 12212             | 0.011 21122             | 0.012 12122             | 0.009 21221             |
|                                | 0.003 21122             | 0.009 22211             | 0.010 21221             | 0.010 22112             | 0.007 22022             | 0.009 22121             |
|                                |                         | 0.008 21122             | 0.004 12122             | 0.006 20222             | 0.007 22121             | 0.008 12212             |
|                                |                         | 0.008 11222             | 0.003 11222             | 0.005 12212             | 0.006 11222             | 0.004 02222             |
|                                |                         | 0.004 12221             |                         | 0.004 21221             | 0.005 20222             | 0.004 22112             |
|                                |                         |                         |                         | 0.004 02222             | 0.005 22211             |                         |
|                                |                         |                         |                         | 0.003 22022             | 0.003 21212             |                         |
|                                |                         |                         |                         | 0.003 12122             |                         |                         |

<sup>a</sup>. Configurations here are listed as occupancy of *d* orbitals, with increasing energy from left to right. For example, in the *T1* column above, “21221” indicates a configuration of  $(d_{z^2})^2(d_{x^2-y^2})^1(d_{xy})^2(d_{xz})^2(d_{yz})^1$  and the “A” number of 0.681 indicates the contribution of that configuration to the *T1* state.

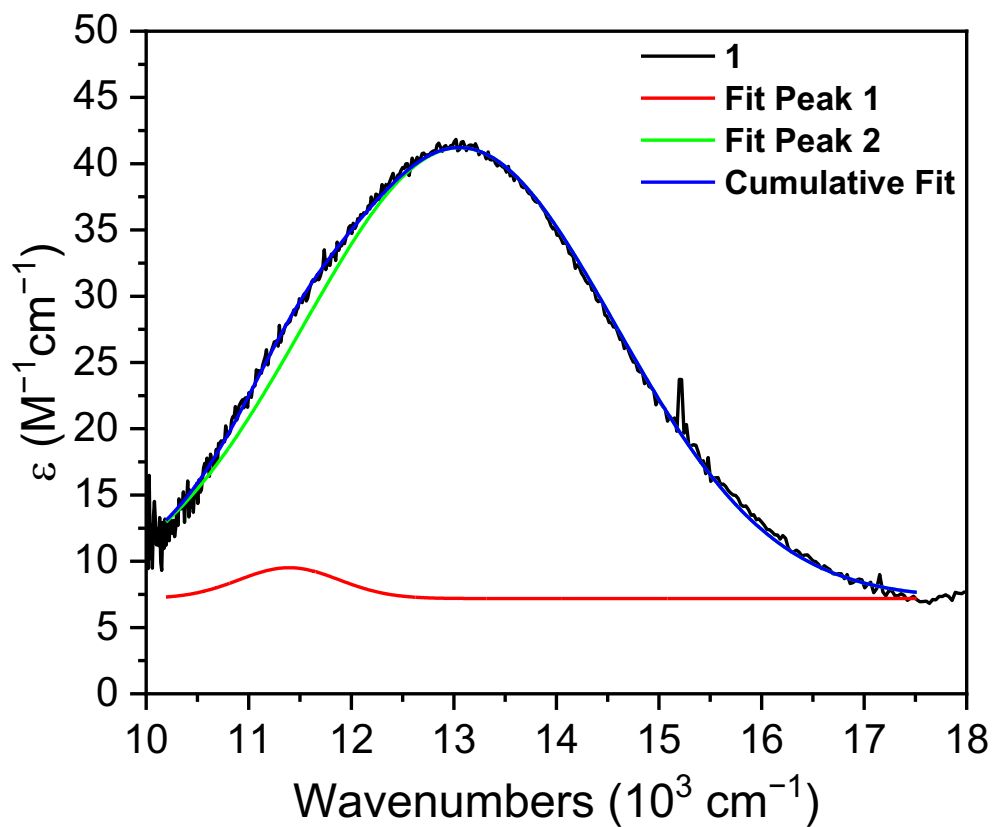

**Figure S1.** Deconvoluted electronic absorption spectra of **1**. Peak 1: 11406  $cm^{-1}$ . Peak 2: 13071  $cm^{-1}$ .



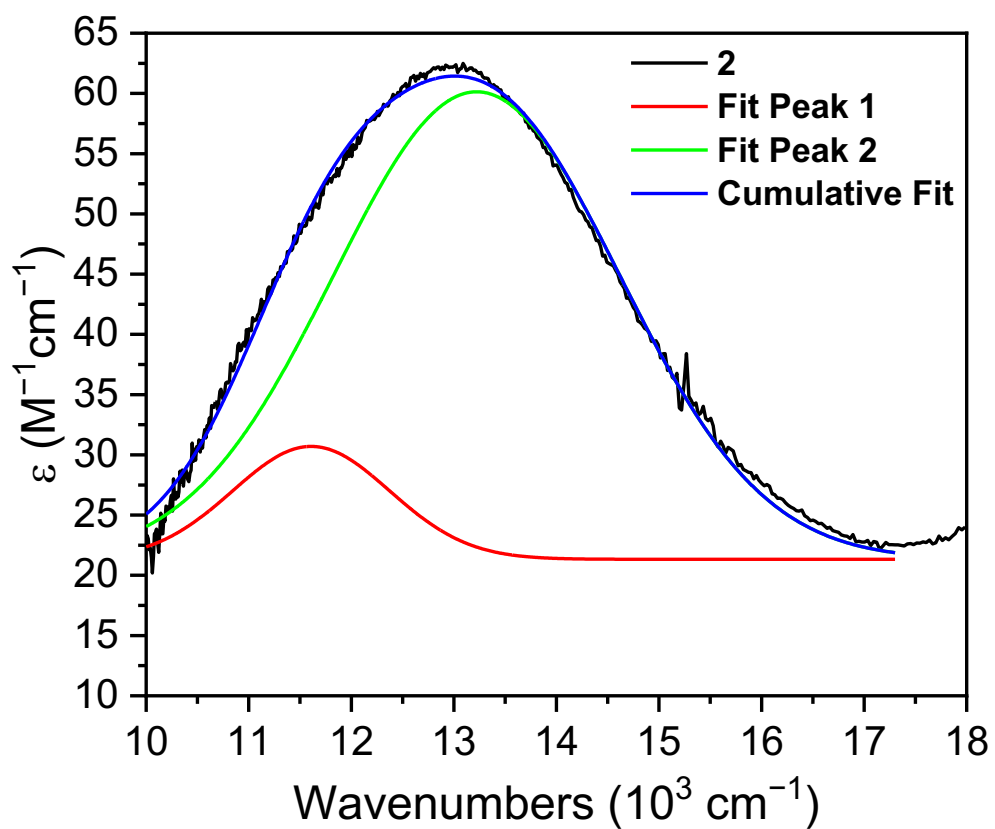

**Figure S2.** Deconvoluted electronic absorption spectra of **1**. Peak 1: 11397  $\text{cm}^{-1}$ . Peak 2: 13053  $\text{cm}^{-1}$ .

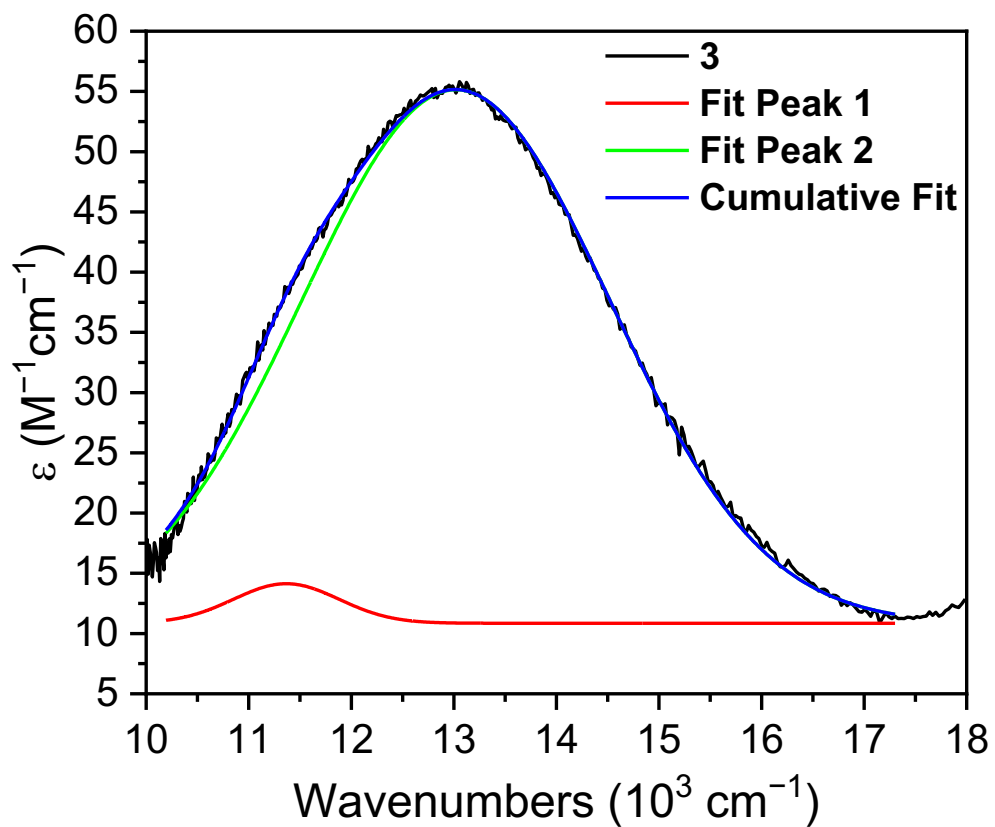

**Figure S3.** Deconvoluted electronic absorption spectra of **1**. Peak 1:  $11608 \text{ cm}^{-1}$ . Peak 2:  $13222 \text{ cm}^{-1}$ .

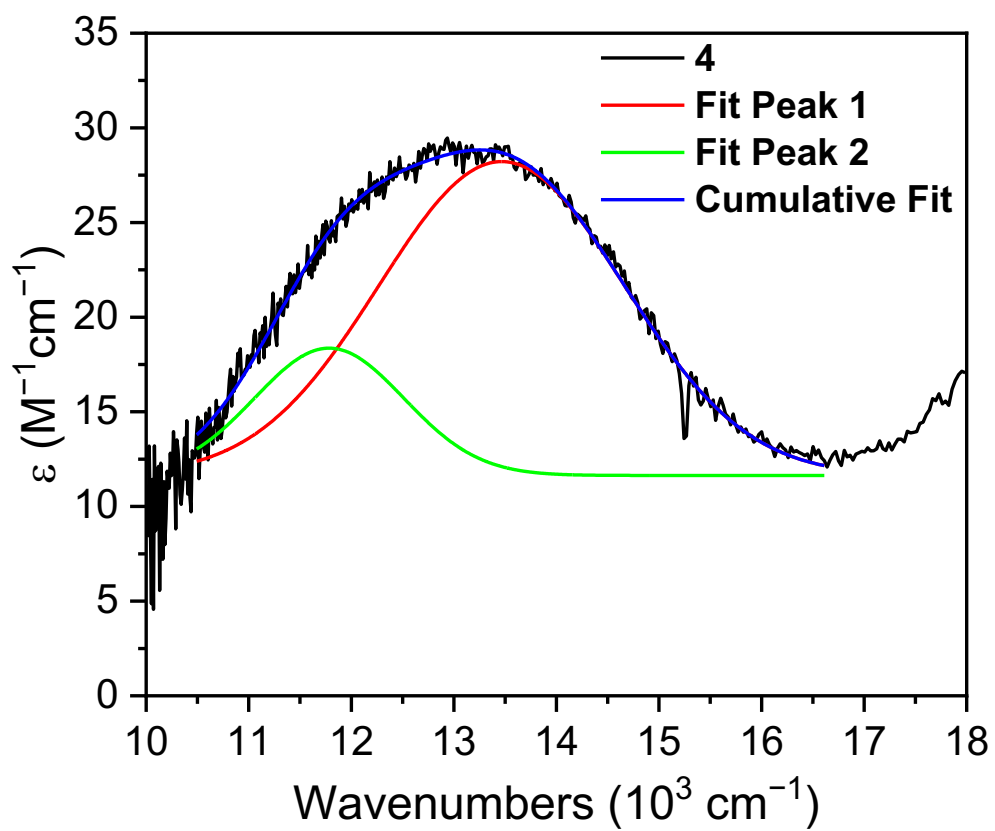

**Figure S4.** Deconvoluted electronic absorption spectra of **1**. Peak 1:  $13412 \text{ cm}^{-1}$ . Peak 2:  $11703 \text{ cm}^{-1}$ .

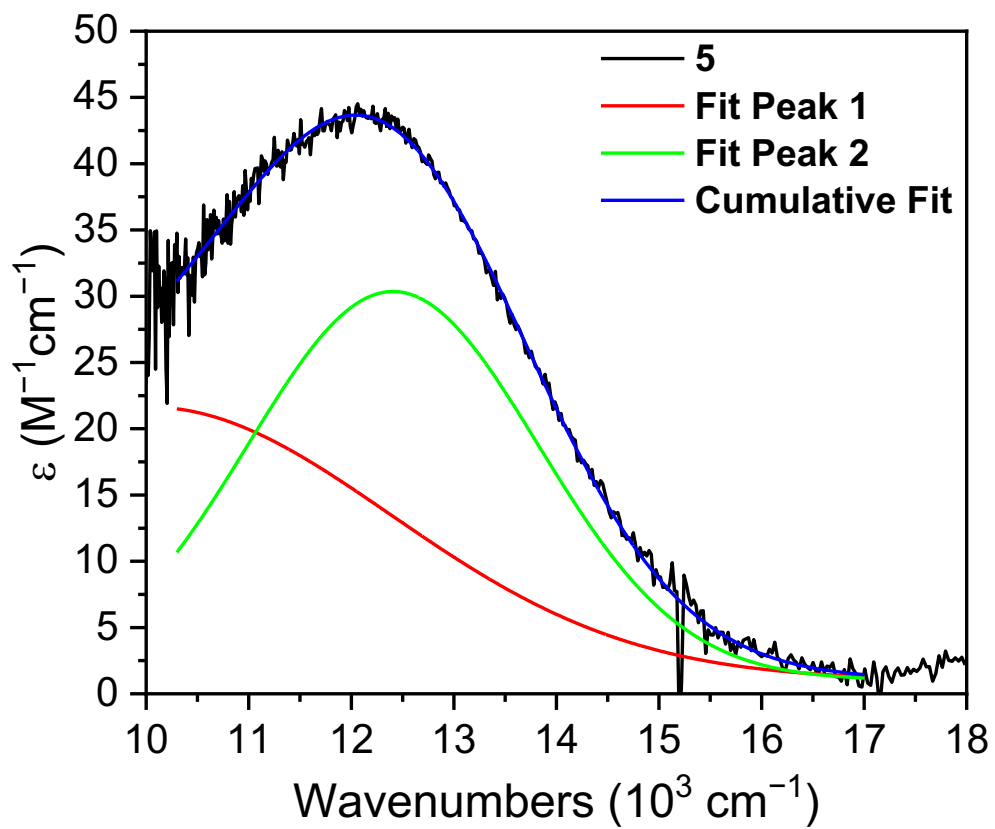

**Figure S5.** Deconvoluted UV-vis spectra of **1**. Peak 1:  $9903 cm^{-1}$ . Peak 2:  $12396 cm^{-1}$ .

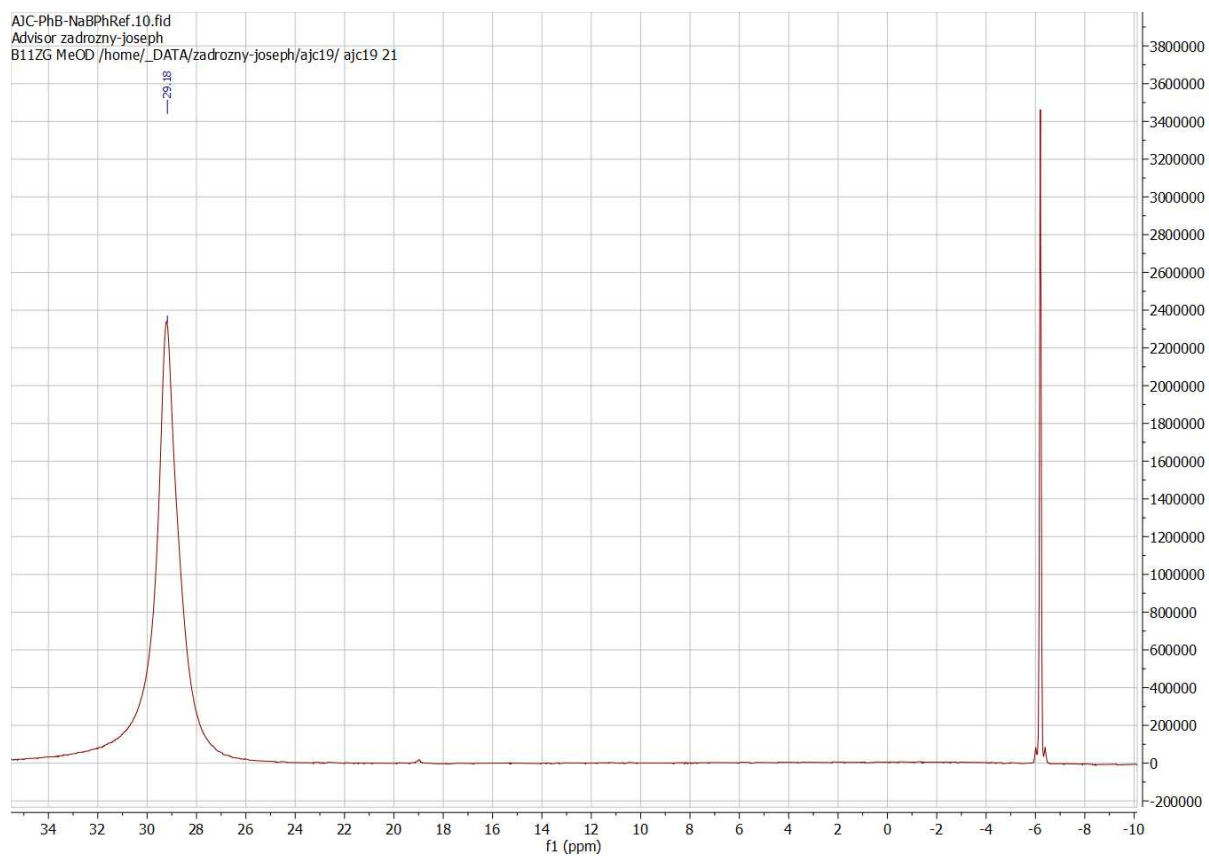

**Figure S6.**  $^{11}\text{B}$  NMR spectra of phenylboronic acid referenced to  $\text{NaBPh}_4$  collected in  $\text{MeOH-d}_4$ .

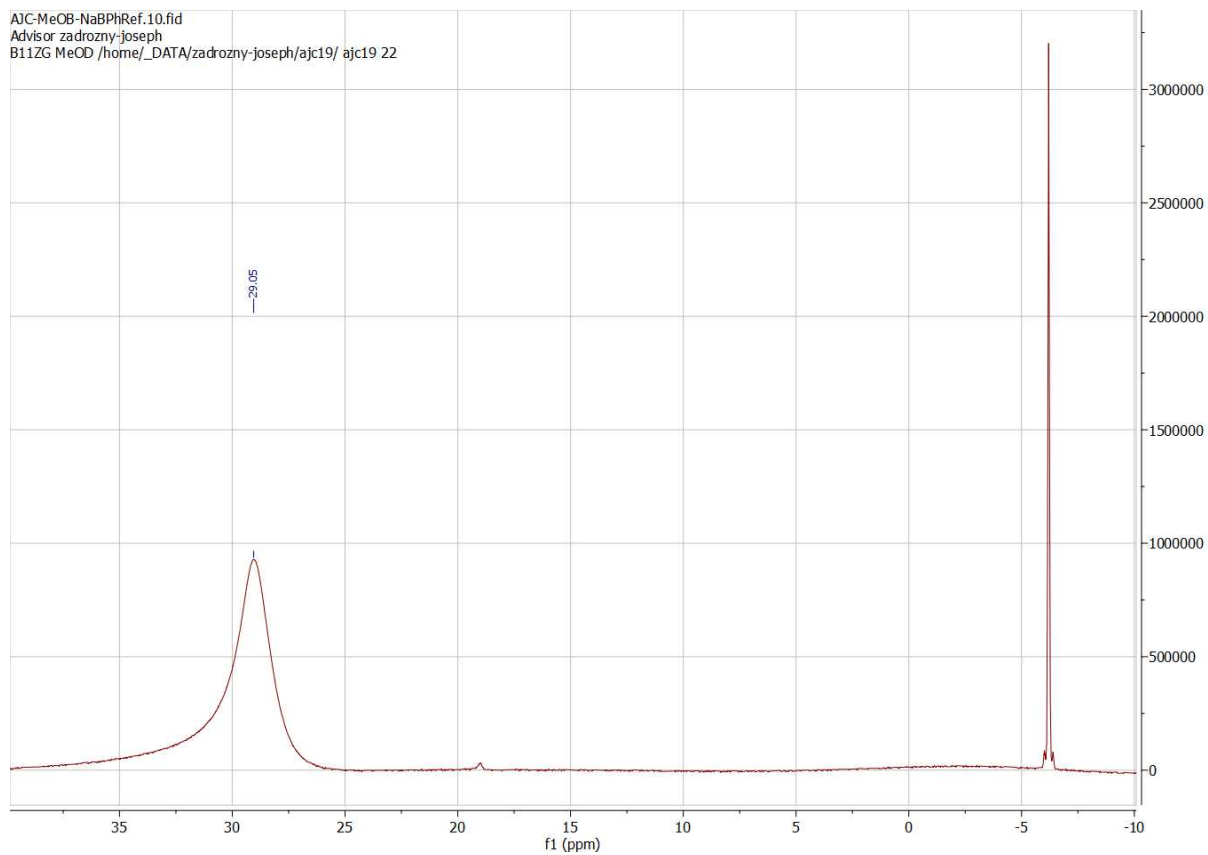

**Figure S7.**  $^{11}\text{B}$  NMR spectra of 3,5-dimethoxyphenylboronic acid referenced to  $\text{NaBPh}_4$  collected in  $\text{MeOH-d}_4$ .

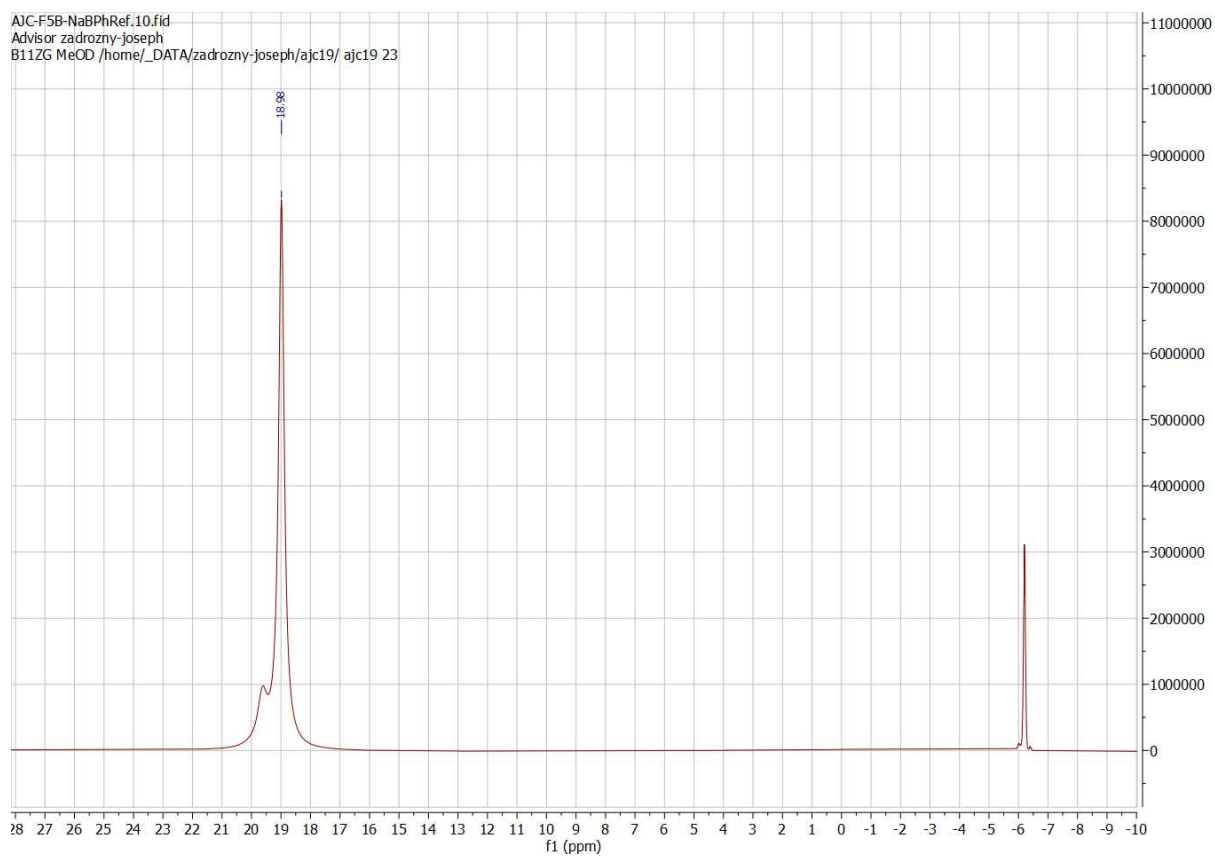

**Figure S8.**  $^{11}\text{B}$  NMR spectra of pentafluorophenylboronic acid referenced to  $\text{NaBPh}_4$  collected in  $\text{MeOH-d}_4$ .

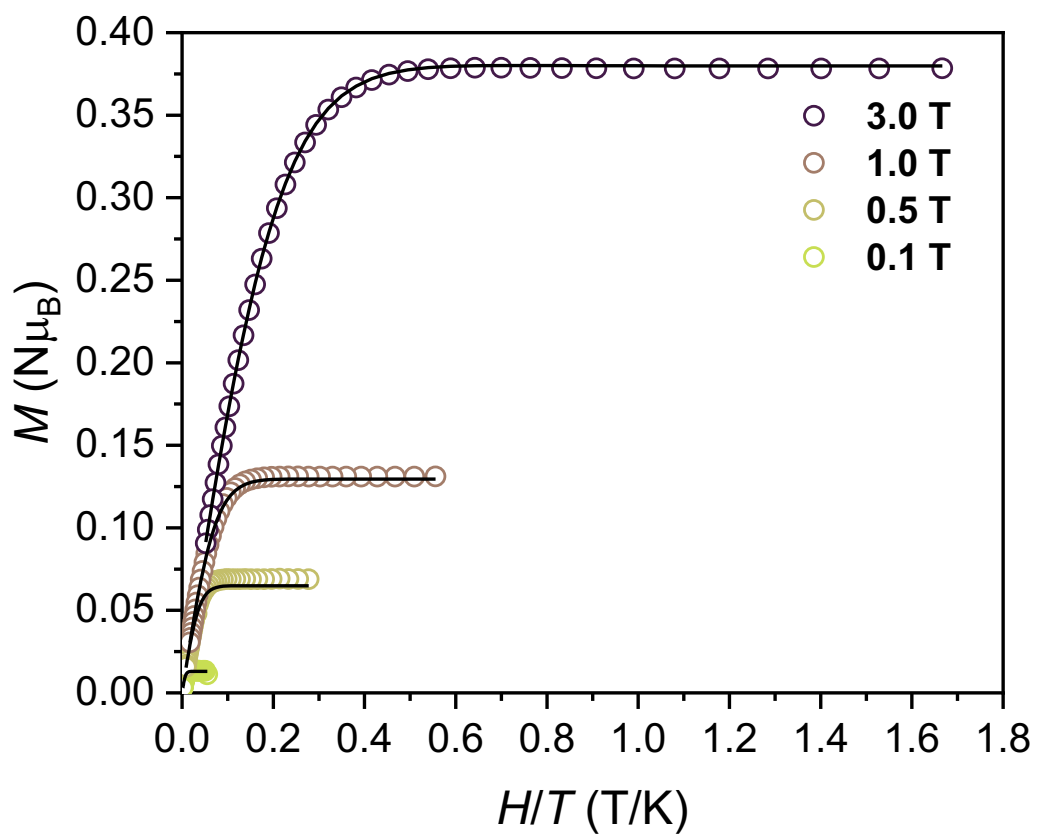

**Figure S9.** Reduced magnetization data and fits obtained through PHI for complex 1.



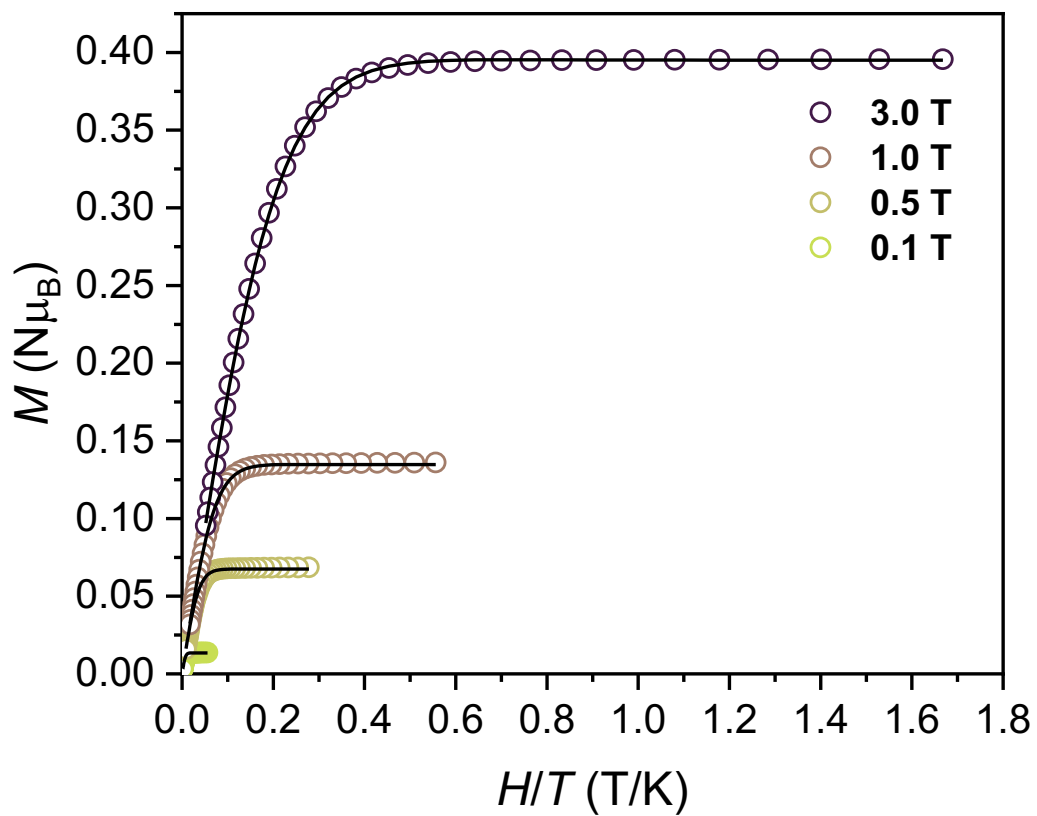

**Figure S10.** Reduced magnetization data and fits obtained through PHI for complex 2.

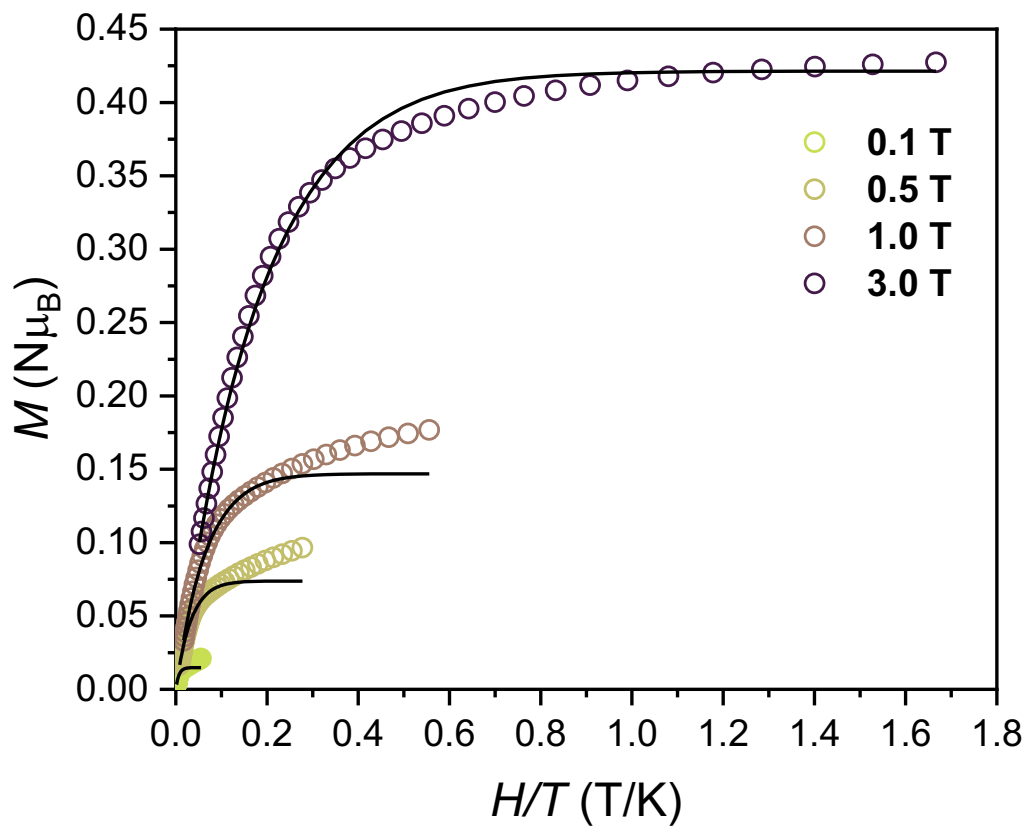

**Figure S11.** Reduced magnetization data and fits obtained through PHI for complex **4**.

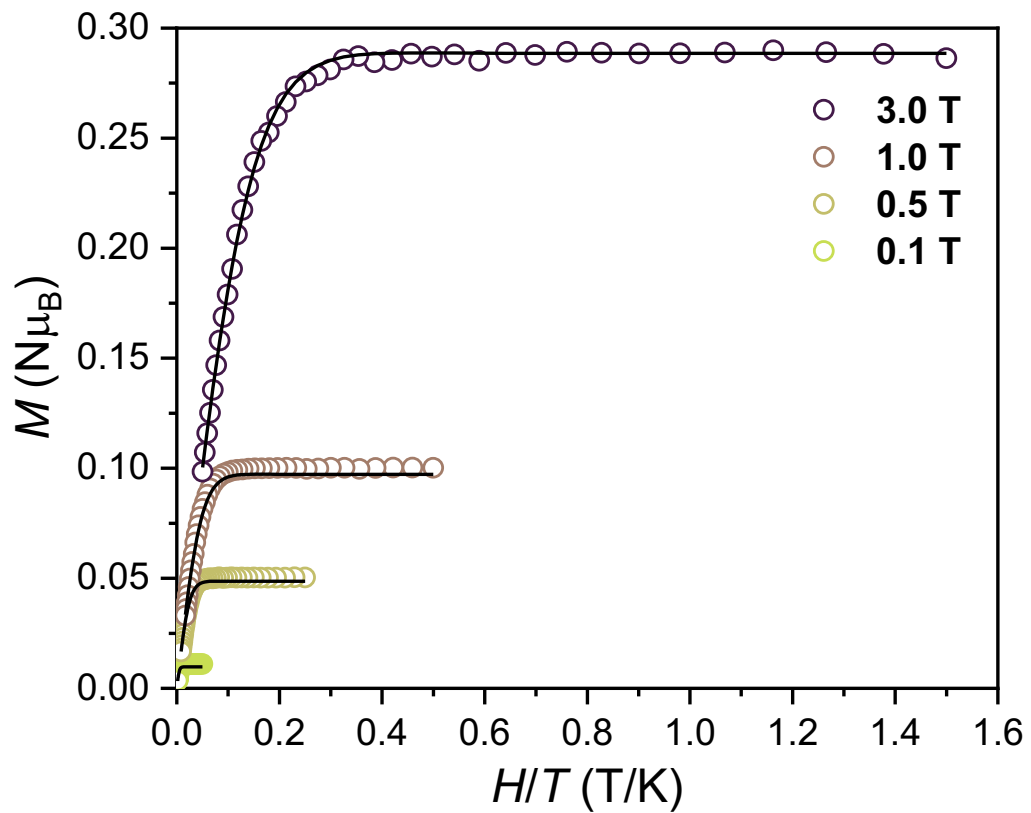

**Figure S12.** Reduced magnetization data and fits obtained through PHI for complex 5.

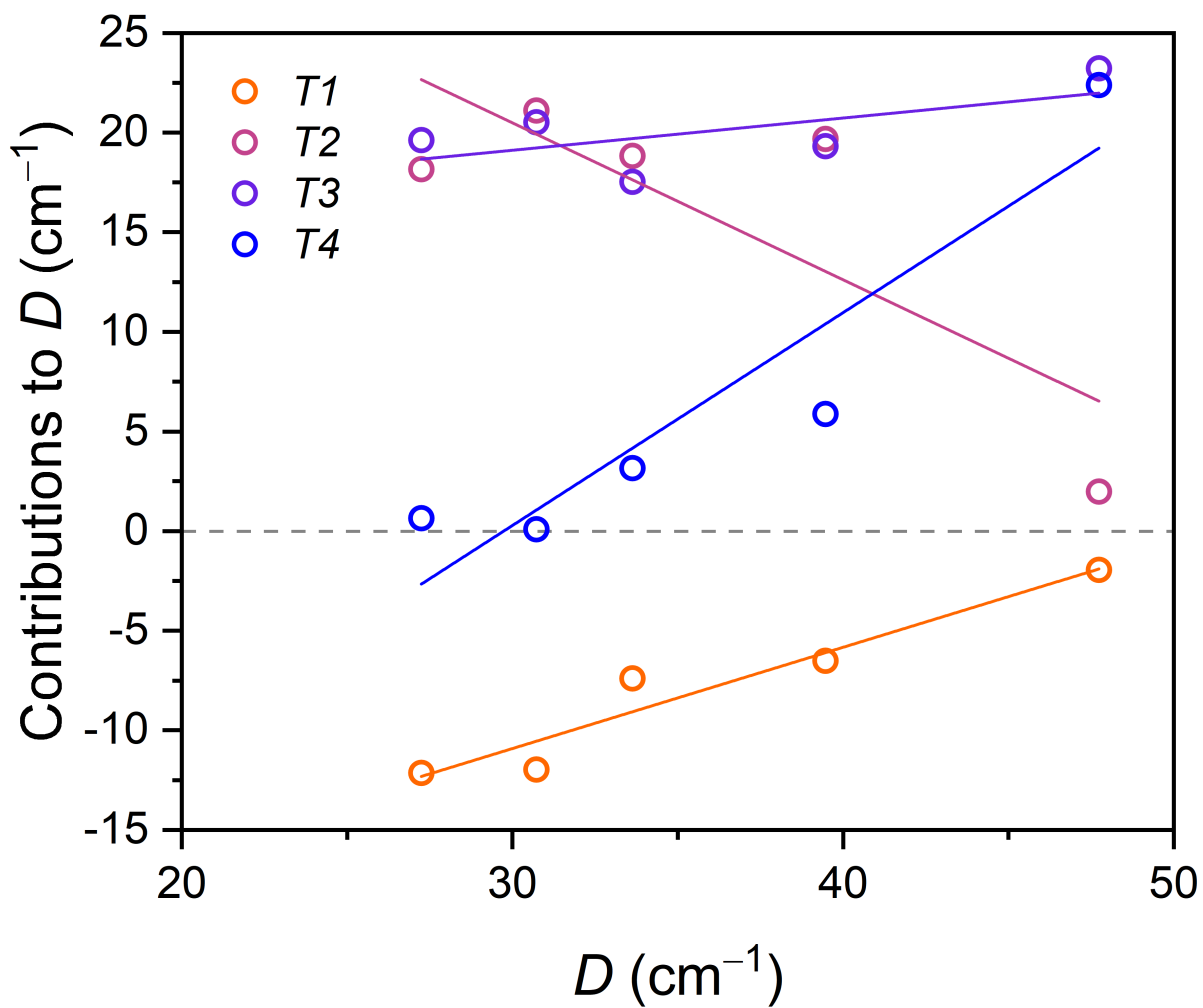

**Figure S13.** Contributions to  $D$  respective of triplet ( $T$ ) excited states relative to the predicted total  $D$  value for each of the five compounds.

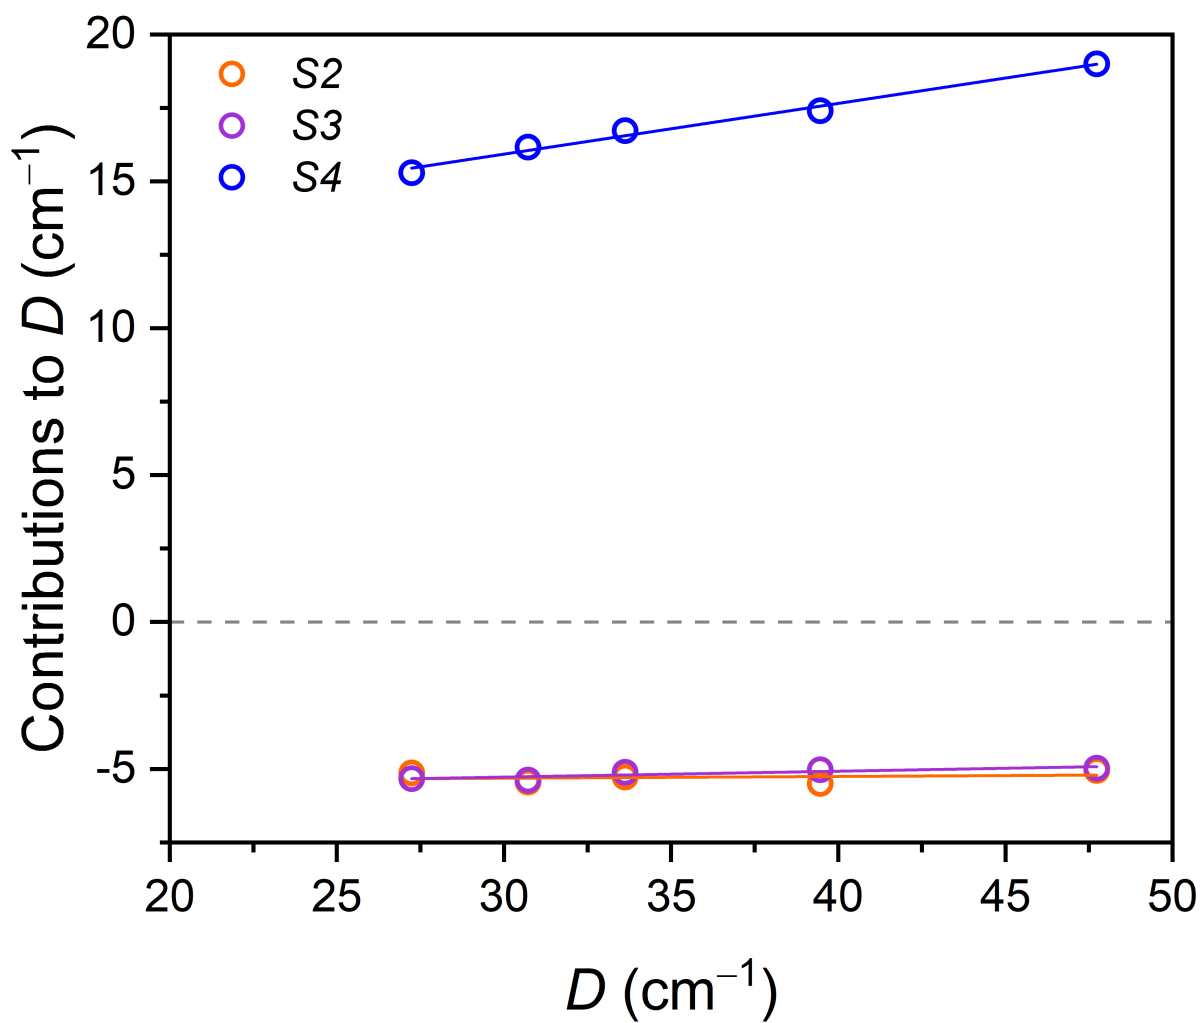

**Figure S14.** Contributions to  $D$  respective of singlet ( $S$ ) excited states relative to the predicted total  $D$  value for each of the five compounds.

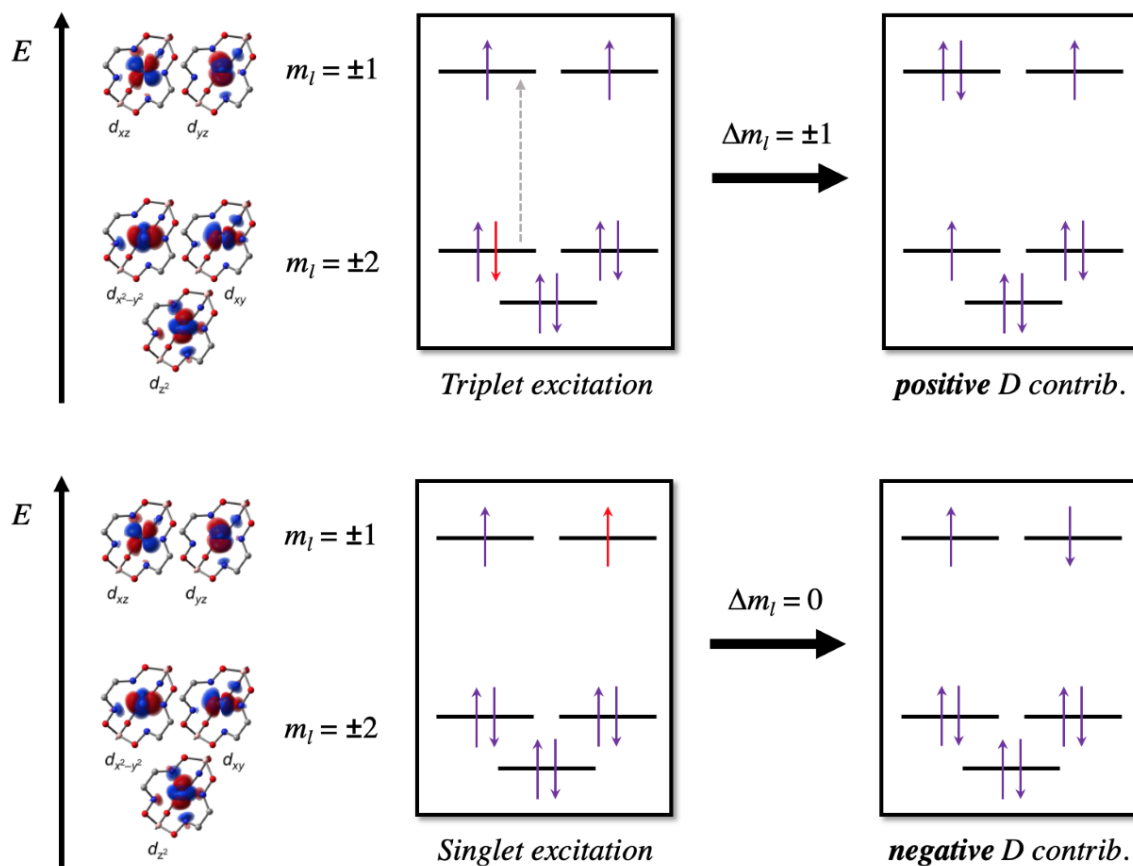

**Figure S15.** Depiction of some example triplet (top) and singlet (bottom) excitations responsible for positive and negative contributions to  $D$ , highlighted by the change in  $\Delta m_l$  for the specific excitation.

## References

- (1) Fowles, G. W. A.; Rice, D. A.; Walton, R. A. The Donor Properties of Simple Ethers—II[1]: Complexes of Manganese(II), Iron(II), Cobalt(II) and Nickel(II) Halides with Tetrahydrofuran and 1,2-Dimethoxyethane. *J. Inorg. Nucl. Chem.* **1969**, *31* (10), 3119–3131.
- (2) Zaitsev, A. B.; Schmidt, E. Yu.; Vasil'tsov, A. M.; Mikhaleva, A. I.; Petrova, O. V.; Afonin, A. V.; Zorina, N. V. 1,2-Dioximes in the Trofimov Reaction. *Chem. Heterocycl. Compd.* **2006**, *42* (1), 34–41.
- (3) Matsubara, R.; Ando, A.; Hasebe, H.; Kim, H.; Tsuneda, T.; Hayashi, M. Synthesis and Synthetic Application of Chloro- and Bromofuroxans. *J. Org. Chem.* **2020**, *85* (9), 5959–5972.
- (4) Sheldrick, G. M. Program for Empirical Absorption Correction of Area Detector Data. *SADABS* **1996**.
- (5) Sheldrick, G. M. SHELXT – Integrated Space-Group and Crystal-Structure Determination. *Acta Crystallogr. Sect. Found. Adv.* **2015**, *71* (1), 3–8.
- (6) Sheldrick, G. M. Crystal Structure Refinement with SHELXL. *Acta Crystallogr. Sect. C Struct. Chem.* **2015**, *71* (1), 3–8.
- (7) Sheldrick, G. M. A Short History of SHELX. *Acta Crystallogr. A* **2008**, *64* (Pt 1), 112–122.
- (8) Bain, G. A.; Berry, J. F. Diamagnetic Corrections and Pascal's Constants. *J. Chem. Educ.* **2008**, *85* (4), 532.
- (9) Neese, F. The ORCA Program System. *WIREs Comput. Mol. Sci.* **2012**, *2* (1), 73–78.
- (10) Neese, F. A Spectroscopy Oriented Configuration Interaction Procedure. *J. Chem. Phys.* **2003**, *119* (18), 9428–9443.
- (11) Schäfer, A.; Horn, H.; Ahlrichs, R. Fully Optimized Contracted Gaussian Basis Sets for Atoms Li to Kr. *J. Chem. Phys.* **1992**, *97* (4), 2571–2577.
- (12) Neese, F.; Wennmo, F.; Hansen, A.; Becker, U. Efficient, Approximate and Parallel Hartree-Fock and Hybrid DFT Calculations. A 'Chain-of-Spheres' Algorithm for the Hartree-Fock Exchange. *Chem. Phys.* **2009**, *356*, 98–109.
- (13) Izsák, R.; Neese, F. An Overlap Fitted Chain of Spheres Exchange Method. *J. Chem. Phys.* **2011**, *135* (14), 144105.
- (14) Aquilante, F.; Pedersen, T. B.; Lindh, R.; Roos, B. O.; Sánchez de Merás, A.; Koch, H. Accurate Ab Initio Density Fitting for Multiconfigurational Self-Consistent Field Methods. *J. Chem. Phys.* **2008**, *128*, 044105.
- (15) Malmqvist, P.-Å.; Roos, B. O. The CASSCF State Interaction Method. *Chem. Phys. Lett.* **1989**, *155* (2), 189–194.
- (16) Singh, S. K.; Eng, J.; Atanasov, M.; Neese, F. Covalency and Chemical Bonding in Transition Metal Complexes: An Ab Initio Based Ligand Field Perspective. *Coord. Chem. Rev.* **2017**, *344*, 2–25.
- (17) Atanasov, M.; Zdrozny, J. M.; Long, J. R.; Neese, F. A Theoretical Analysis of Chemical Bonding, Vibronic Coupling, and Magnetic Anisotropy in Linear Iron(II) Complexes with Single-Molecule Magnet Behavior. *Chem. Sci.* **2012**, *4* (1), 139–156.
- (18) Angeli, C.; Cimraglia, R.; Evangelisti, S.; Leininger, T.; Malrieu, J.-P. Introduction of N-Electron Valence States for Multireference Perturbation Theory. *J. Chem. Phys.* **2001**, *114* (23), 10252–10264.
- (19) Angeli, C.; Cimraglia, R.; Malrieu, J.-P. N-Electron Valence State Perturbation Theory: A Fast Implementation of the Strongly Contracted Variant. *Chem. Phys. Lett.* **2001**, *350* (3), 297–305.

- (20) Angeli, C.; Cimiraglia, R.; Malrieu, J.-P. N-Electron Valence State Perturbation Theory: A Spinless Formulation and an Efficient Implementation of the Strongly Contracted and of the Partially Contracted Variants. *J. Chem. Phys.* **2002**, *117* (20), 9138–9153.
- (21) Stoll, S.; Schweiger, A. EasySpin, a Comprehensive Software Package for Spectral Simulation and Analysis in EPR. *J. Magn. Reson.* **2006**, *178* (1), 42–55.
